# Supplementary material for: Facile synthesis of multifunctional magnetic porous organic polymers with high catalytic performance and dye adsorption capacity
Source: Royal Society of Chemistry journal article supplement (doi:10.1039/d3nj04941h), 2024-01-01

## Supporting Information

### Facile Synthesis of Multifunctional Magnetic Porous Organic Polymers with High Catalytic Performance and Dye Adsorption Capacity

Ahmad Nouri Parouch, Nadia Koukabi\*

*Department of Chemistry, Semnan University, Semnan, Iran*

---

\* Corresponding author.

Tel.: +98-23-336-54058; fax: +98-23-336-54110; E-mail: [N.koukabi@semnan.ac.ir](mailto:N.koukabi@semnan.ac.ir)

The adsorption kinetics for the adsorption of MB was investigated. The obtained adsorption data for MB was analyzed according to the pseudo-first-order kinetic model using Eq (1):

$$\log (q_t - q_e) = \log q_e - \frac{k}{2.303}t \quad \text{Eq (1)}$$

where  $k$  is the rate constant of the pseudo-first-order adsorption ( $\text{min}^{-1}$ ),  $q_t$  is the amount of analyte adsorbed at time  $t$  ( $\text{mg g}^{-1}$ ), and  $q_e$  is the amount of analyte adsorbed per mass unit of adsorbent at equilibrium ( $\text{mg g}^{-1}$ ).

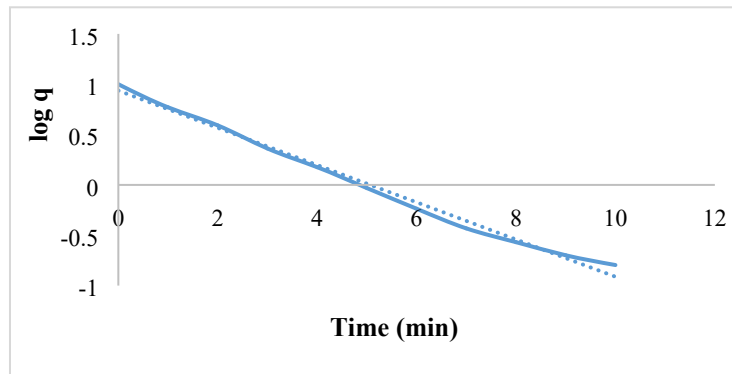

**Figure S1** Pseudo-first-order kinetic of MB ( $10 \text{ mg L}^{-1}$ ) adsorption on MOP-F

The Langmuir equation's linear form is provided by Eq (2):

$$\frac{C}{q} = \frac{1}{q_e}C + \frac{1}{k q_e} \quad \text{Eq (2)}$$

where  $q$  ( $\text{mg g}^{-1}$ ) and  $C$  ( $\text{mg L}^{-1}$ ) respectively are the amount of metal ion adsorbed on the sorbent surface and the metal ion concentration in solution, both at equilibrium,  $k$  ( $\text{L mg}^{-1}$ ) is the Langmuir constant and  $q_e$  ( $\text{mg g}^{-1}$ ) is the maximum sorption capacity for monolayer formation on the sorbent surface.

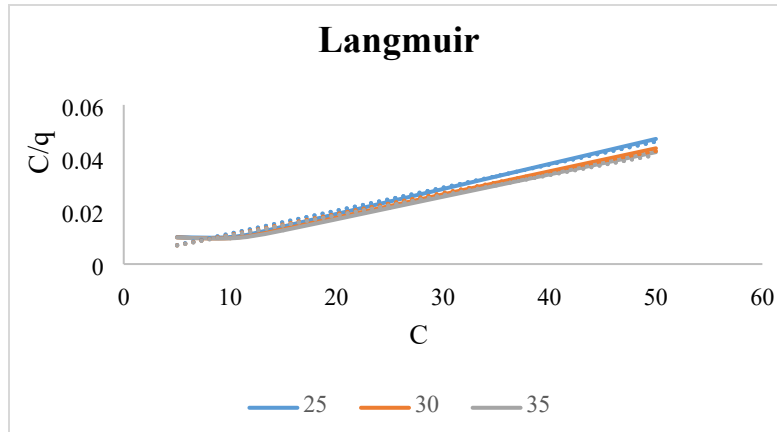

**Figure S2** Linear plots of Langmuir isotherm model for MB sorption by MOP-F at different temperatures  
25 °C:

$$y = 0.0009x + 0.0028$$

$$\frac{1}{k q_e} = 0.0028 \rightarrow k = 0.3214$$

$$\frac{1}{q_e} = 0.0009 \rightarrow q_e = 1111.11$$

$$R^2 = 0.9856$$

30 °C:

$$y = 0.0008x + 0.0031$$

$$\frac{1}{k q_e} = 0.0031 \rightarrow k = 0.2580$$

$$\frac{1}{q_e} = 0.0008 \rightarrow q_e = 1250$$

$$R^2 = 0.9828$$

35 °C:

$$y = 0.0008x + 0.0032$$

$$\frac{1}{k q_e} = 0.0032 \rightarrow k = 0.2500$$

$$\frac{1}{q_e} = 0.0008 \rightarrow q_e = 1250$$

$$R^2 = 0.9811$$

# Spectral analysis of the products

**Table 3, Entry 1:**

**(E)-3-phenyl-2-(1H-tetrazol-5-yl)acrylonitrile.** M.P: 168-170° C. <sup>1</sup>H-NMR (DMSO-d<sub>6</sub>), δppm: 2.5(brs, NH, overlap with solvent) 7.59-7.62 (m, 3H, CH-Ar), 8.00-8.03 (m, 2H, CH-Ar), 8.39 (s, 1H, CH). <sup>13</sup>C-NMR (DMSO-d<sub>6</sub>), δppm: 97.01, 115.59, 129.40, 129.54, 129.93, 132.23, 132.43, 148.5.

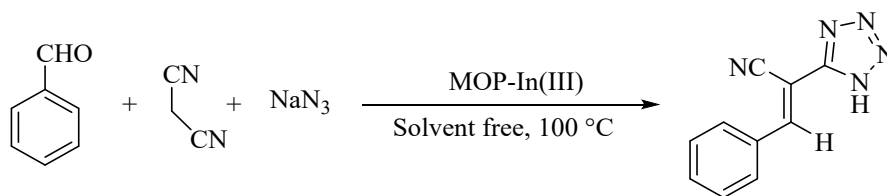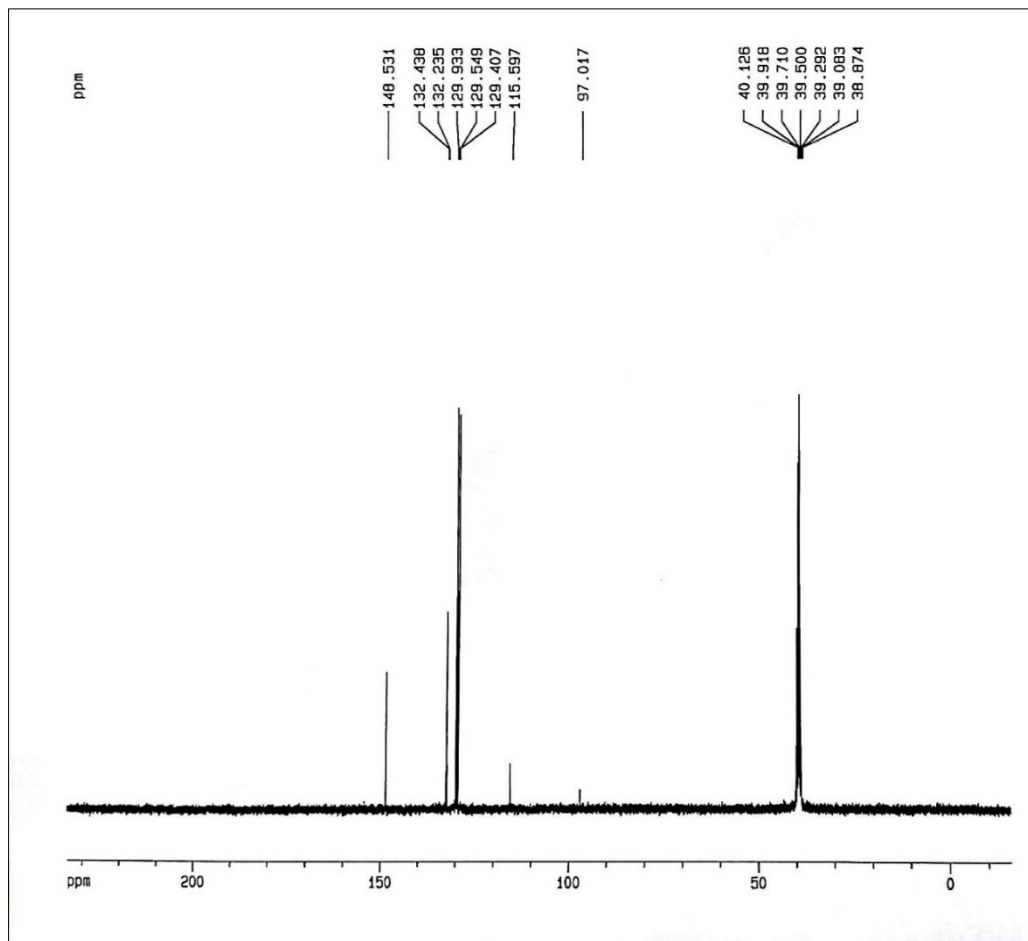

<sup>13</sup>C-NMR, (E)-3-phenyl-2-(1H-tetrazol-5-yl)acrylonitrile

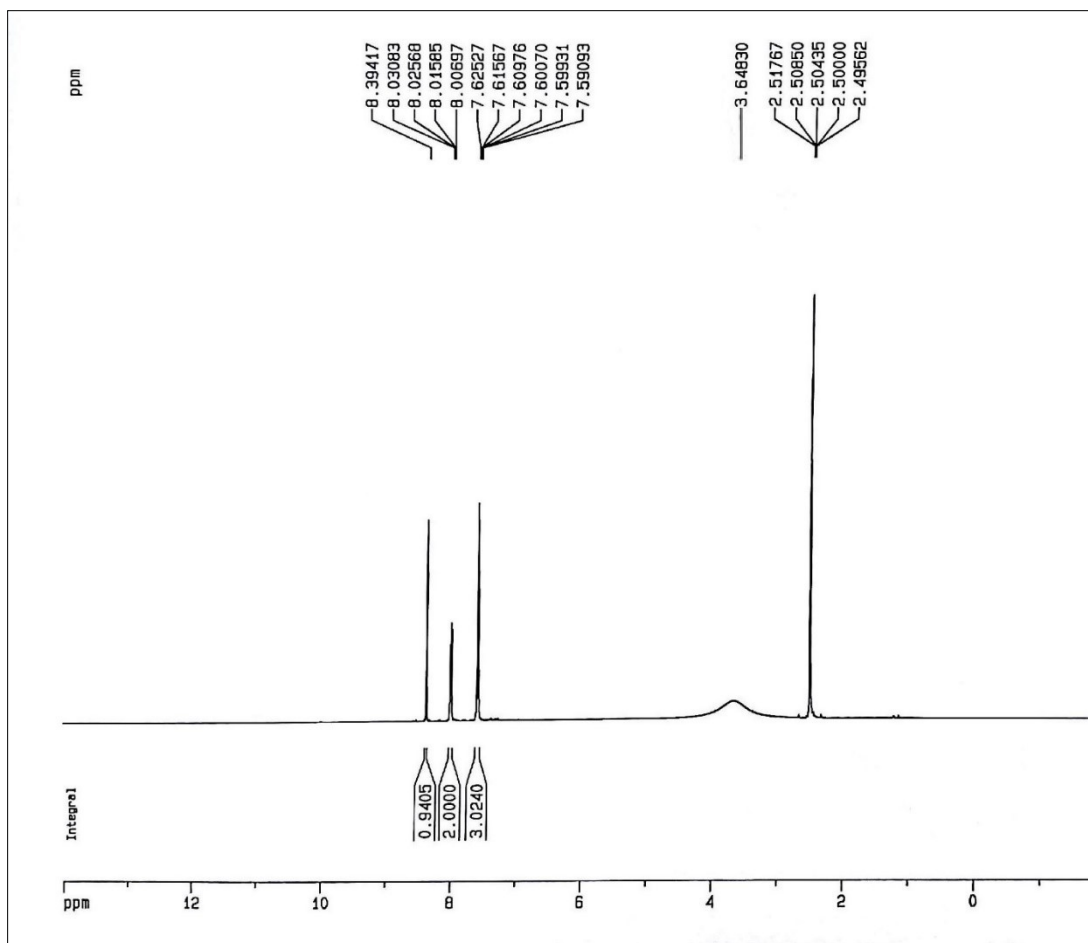

<sup>1</sup>H NMR, (E)-3-phenyl-2-(1H-tetrazol-5-yl)acrylonitrile

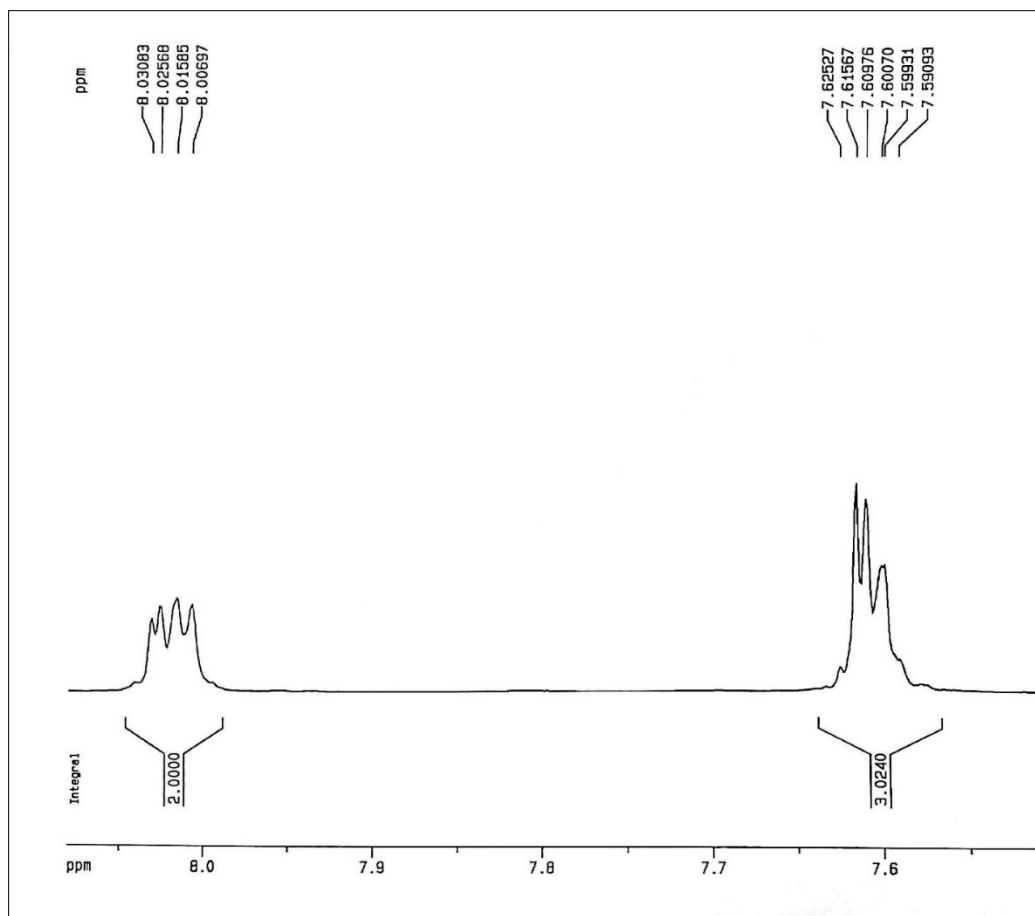

<sup>1</sup>H NMR, (E)-3-phenyl-2-(1H-tetrazol-5-yl)acrylonitrile

**Table 3, Entry 9:**

**(E)-2-(1H-tetrazol-5-yl)-3-(thiophen-2-yl)acrylonitrile.** M.P: 133-136° C. <sup>1</sup>H-NMR (DMSO-d<sub>6</sub>), δppm: 2.5(bris, NH, overlap with solvent), 7.32-7.35 (t, 1 H, CH), 7.93-7.94 (d, 1 H, CH), 8.11-8.12 (d, 1 H, CH), 8.59 (s, 1 H, CH). <sup>13</sup>C-NMR (DMSO-d<sub>6</sub>), δppm: 92.28, 115.80, 128.67, 134.95, 136.11, 137.88, 141.13, 155.13.

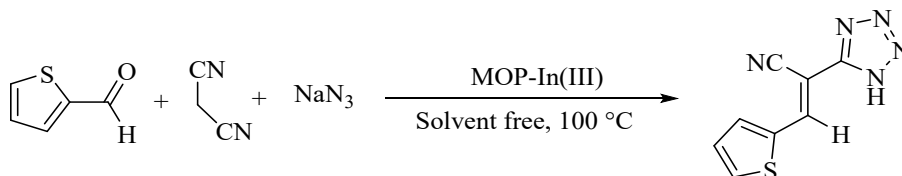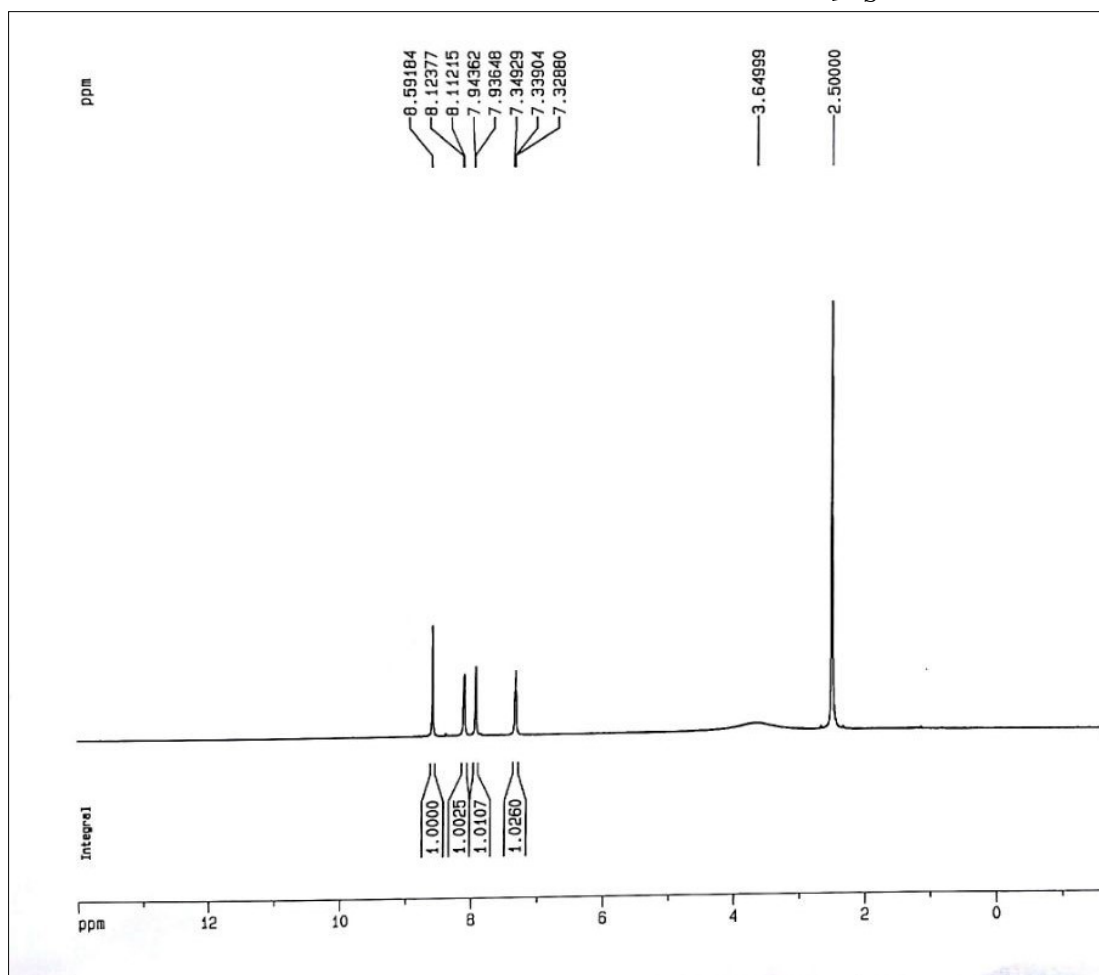

<sup>1</sup>H NMR, (E)-2-(1H-tetrazol-5-yl)-3-(thiophen-2-yl)acrylonitrile.

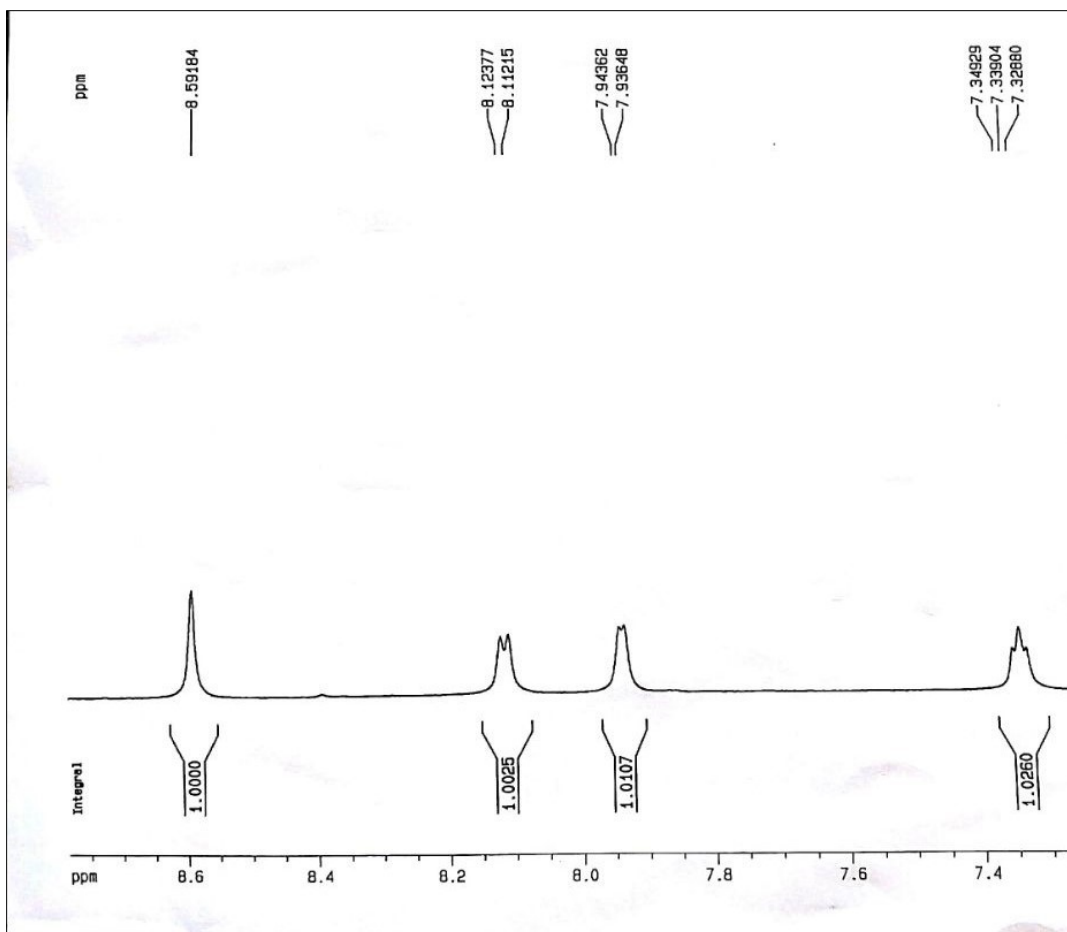

<sup>1</sup>H NMR, (E)-2-(1H-tetrazol-5-yl)-3-(thiophen-2-yl)acrylonitrile.



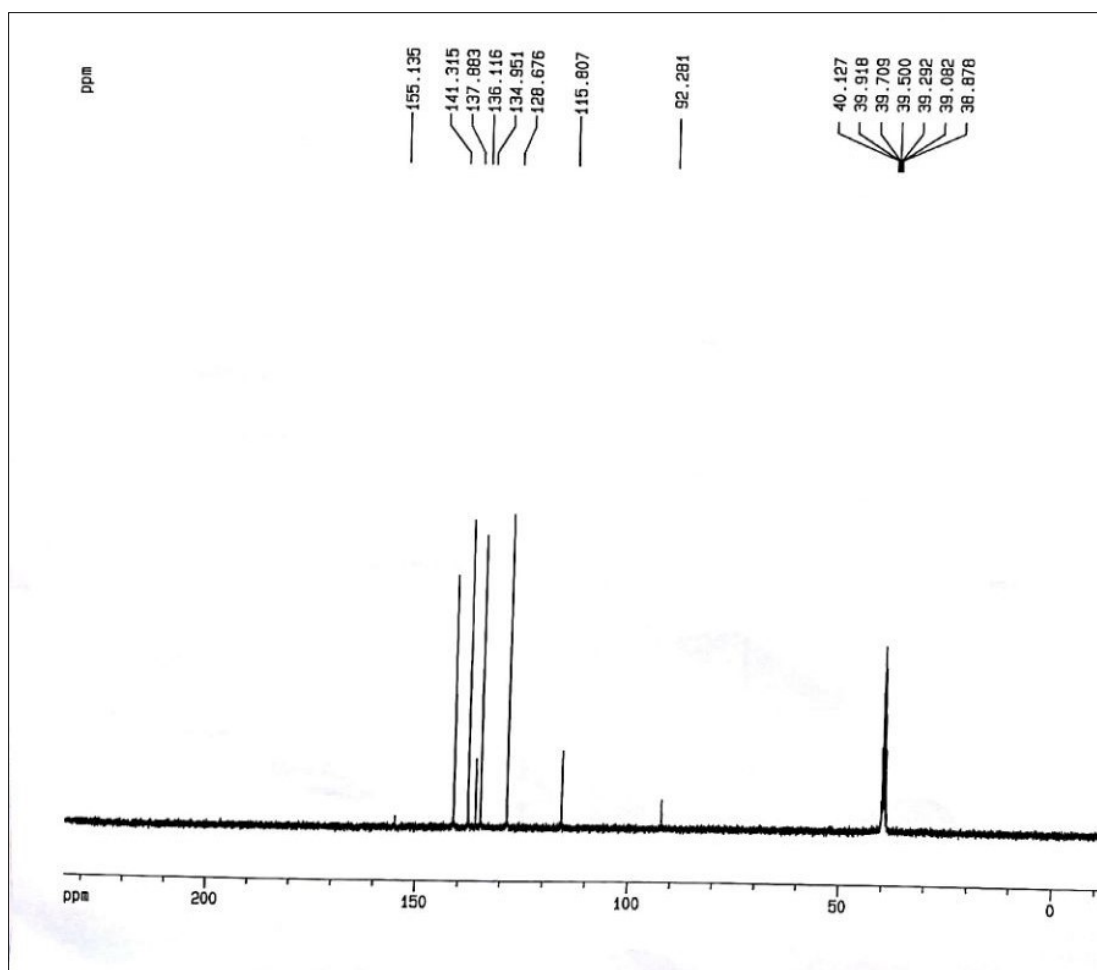

$^{13}\text{C}$ NMR, (E)-2-(1H-tetrazol-5-yl)-3-(thiophen-2-yl)acrylonitrile.

**Table 3, Entry 4:**

**(E)-3-(4-methoxyphenyl)-2-(1H-tetrazol-5-yl)acrylonitrile.** M.P: 153-155° C. <sup>1</sup>H-NMR (DMSO-d<sub>6</sub>), δppm: 2.5(brs, NH, overlap with solvent) 3.86 (s, 3H, CH), 7.14-7.16 (d, 2H, CH-Ar), 8.01-8.03 (d, 2H, CH-Ar), 8.27 (s, 1H, CH). <sup>13</sup>C-NMR (DMSO-d<sub>6</sub>), δppm: 55.73, 92.97, 114.99, 116.10, 124.48, 132.36, 148.16, 155.33, 162.68.

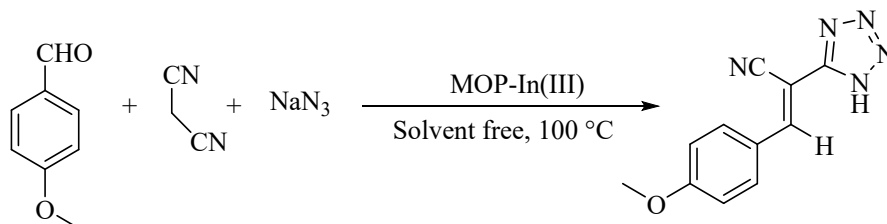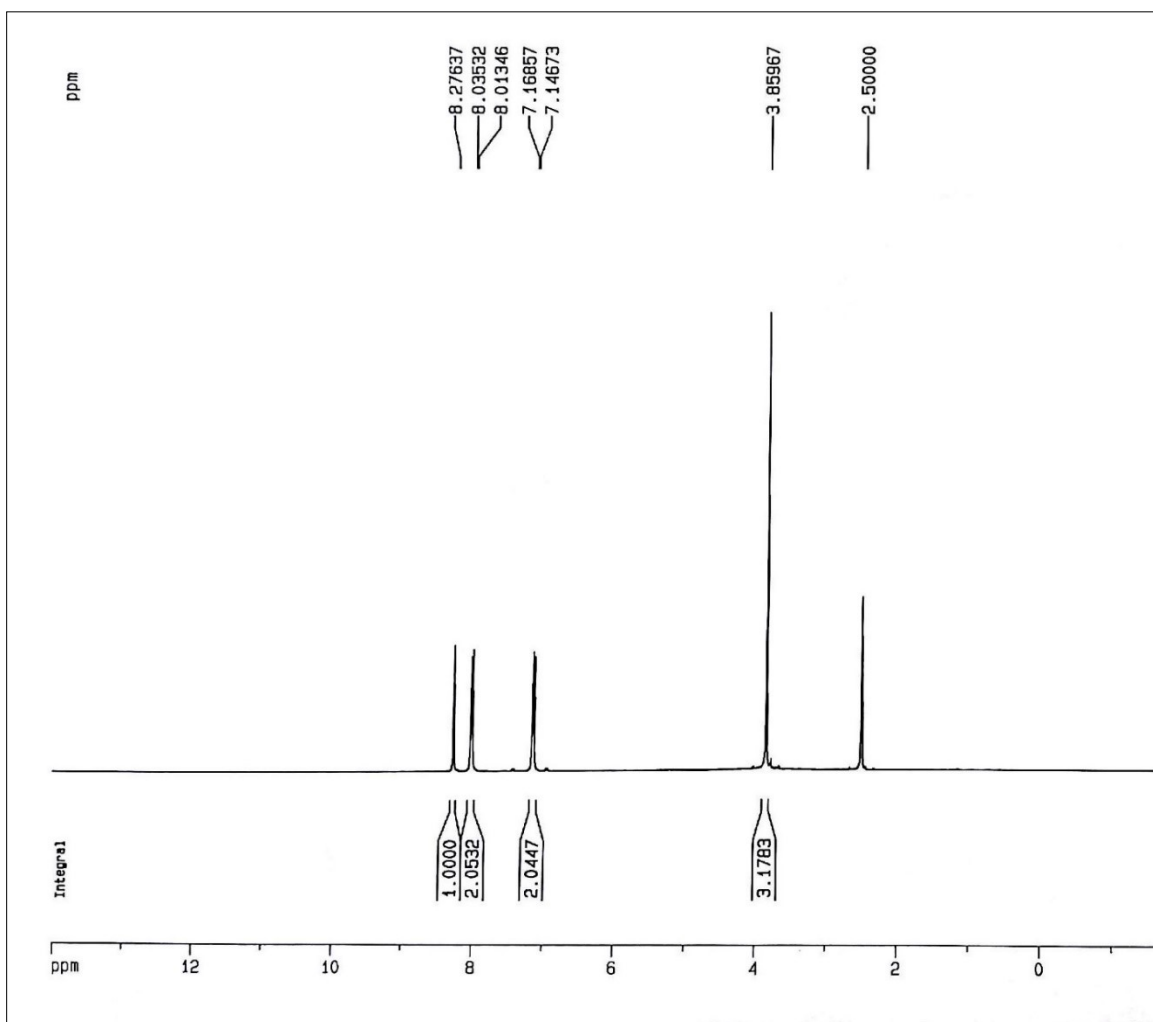

<sup>1</sup>H NMR, (E)-3-(4-methoxyphenyl)-2-(1H-tetrazol-5-yl)acrylonitrile.

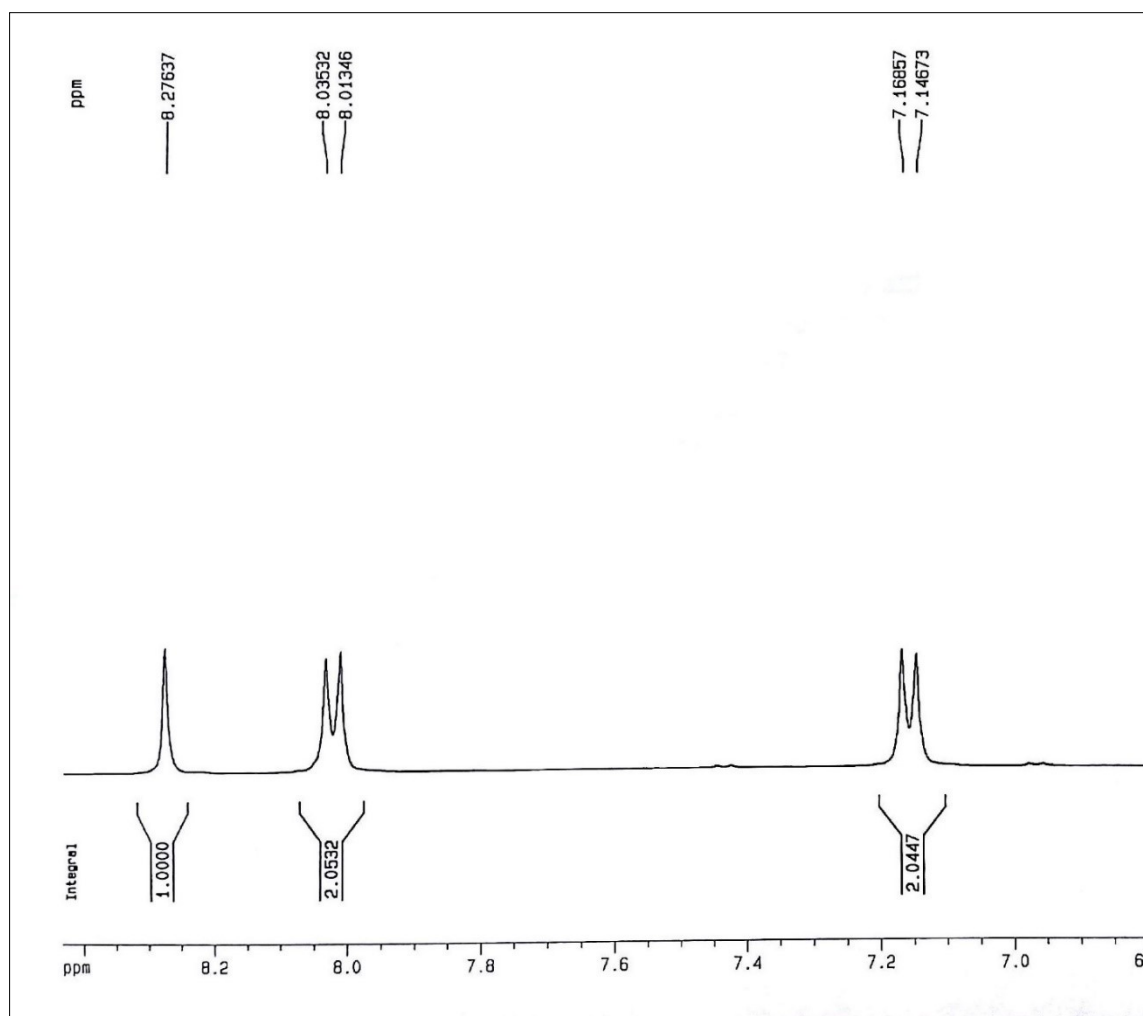

$^1\text{H}$ NMR, (E)-3-(4-methoxyphenyl)-2-(1H-tetrazol-5-yl)acrylonitrile.

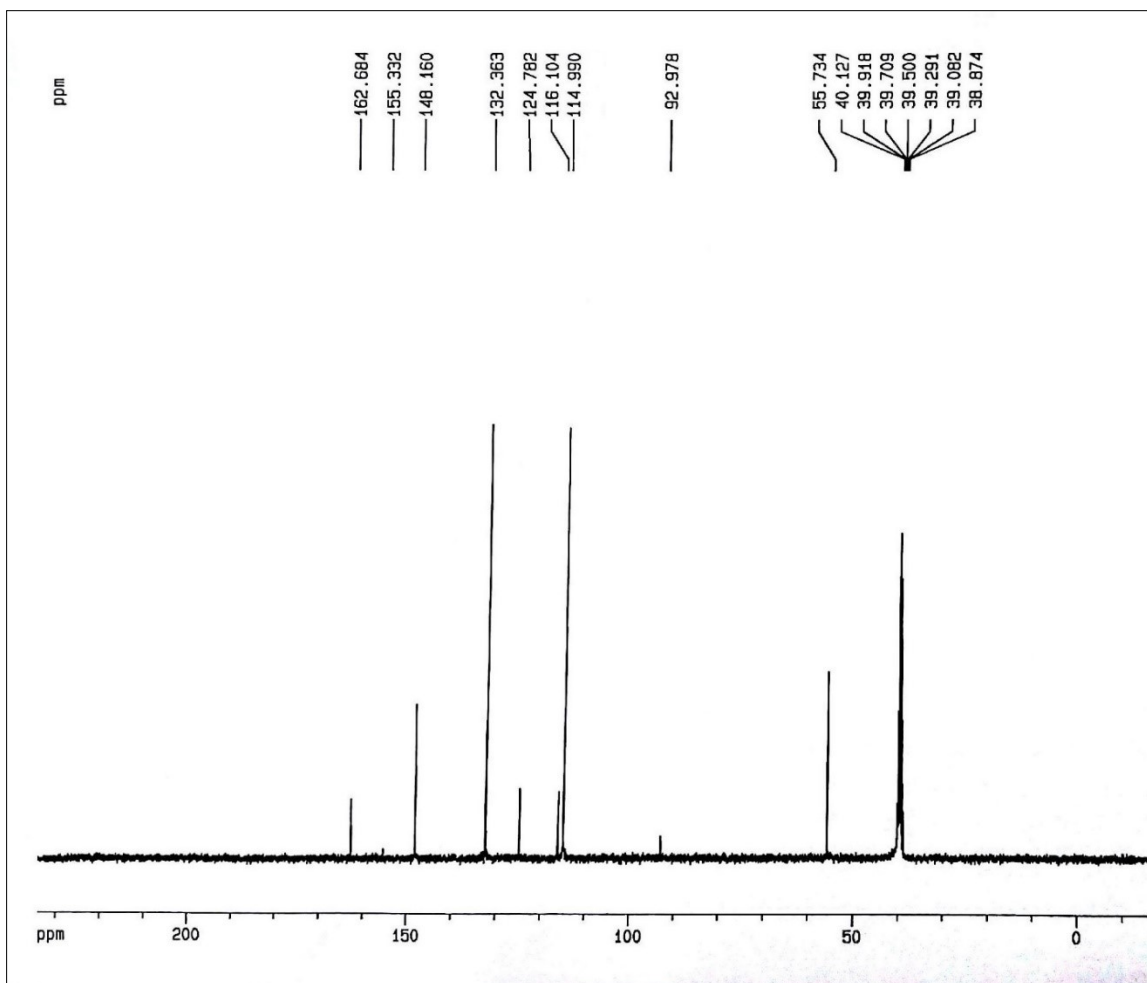

$^{13}\text{C}$ NMR, (E)-3-(4-methoxyphenyl)-2-(1H-tetrazol-5-yl)acrylonitrile.

**Table 3, Entry 5:**

**(E)-2-(1H-tetrazol-5-yl)-3-(p-tolyl)acrylonitrile.** M.P: 188-191° C. <sup>1</sup>H-NMR (DMSO-d<sub>6</sub>), δppm: 2.5 (brs, NH, overlap with solvent), 2.39 (s, 3H, CH), 7.40-7.42(d, 2H, CH-Ar), 7.91-7.93(d, 2H, CH-Ar), 8.33 (s, 1H, CH). <sup>13</sup>C-NMR (DMSO-d<sub>6</sub>), δppm: 21.34, 95.48, 115.77, 129.53, 130.03, 130.06, 143.17, 148.54.

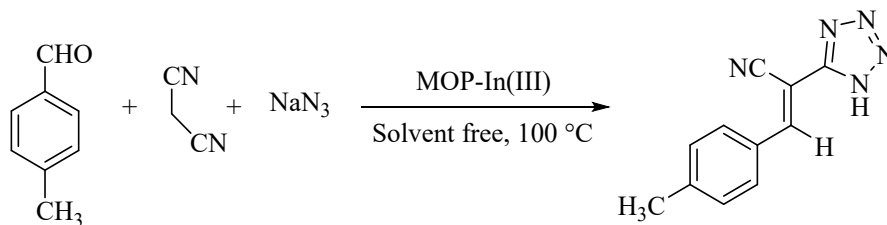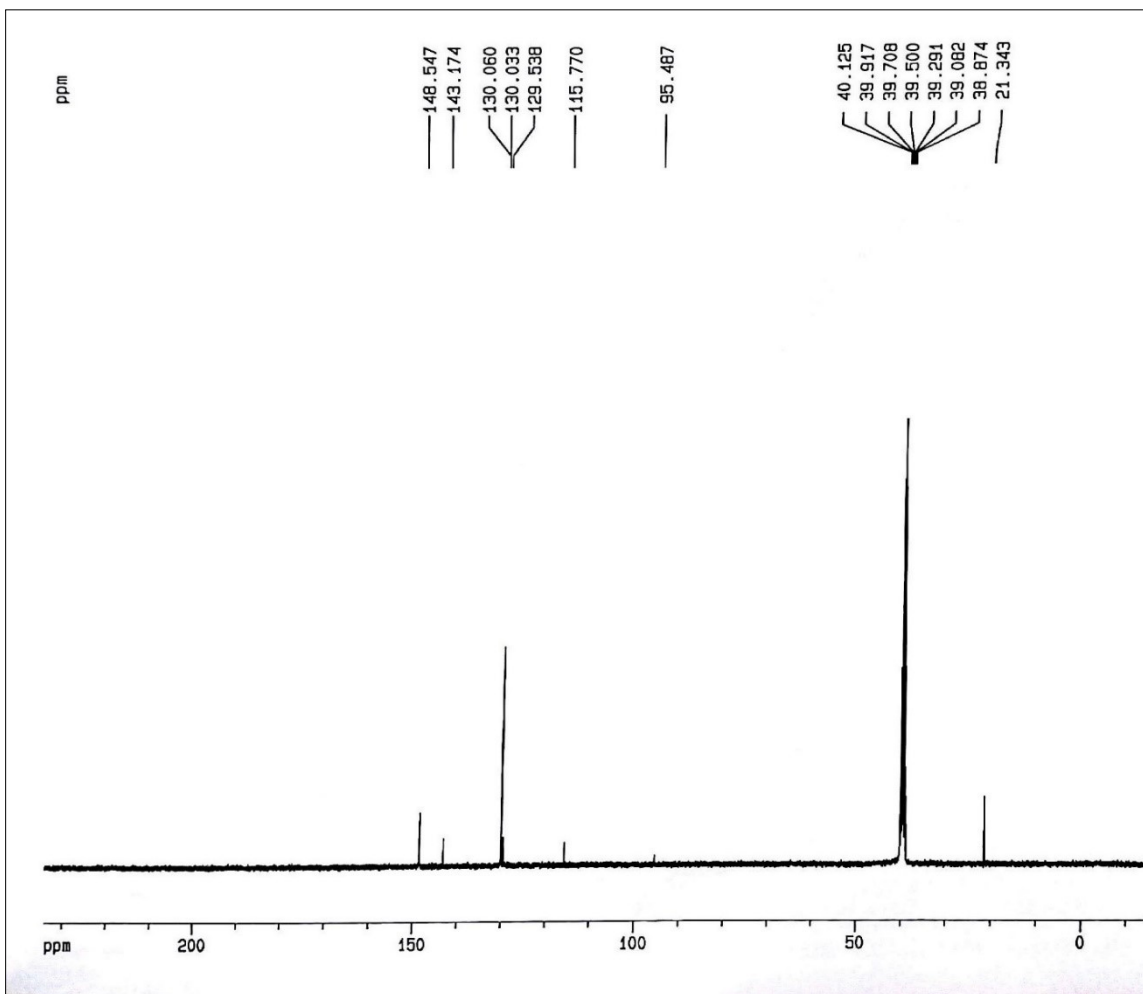

<sup>13</sup>C-NMR, (E)-2-(1H-tetrazol-5-yl)-3-(p-tolyl)acrylonitrile.

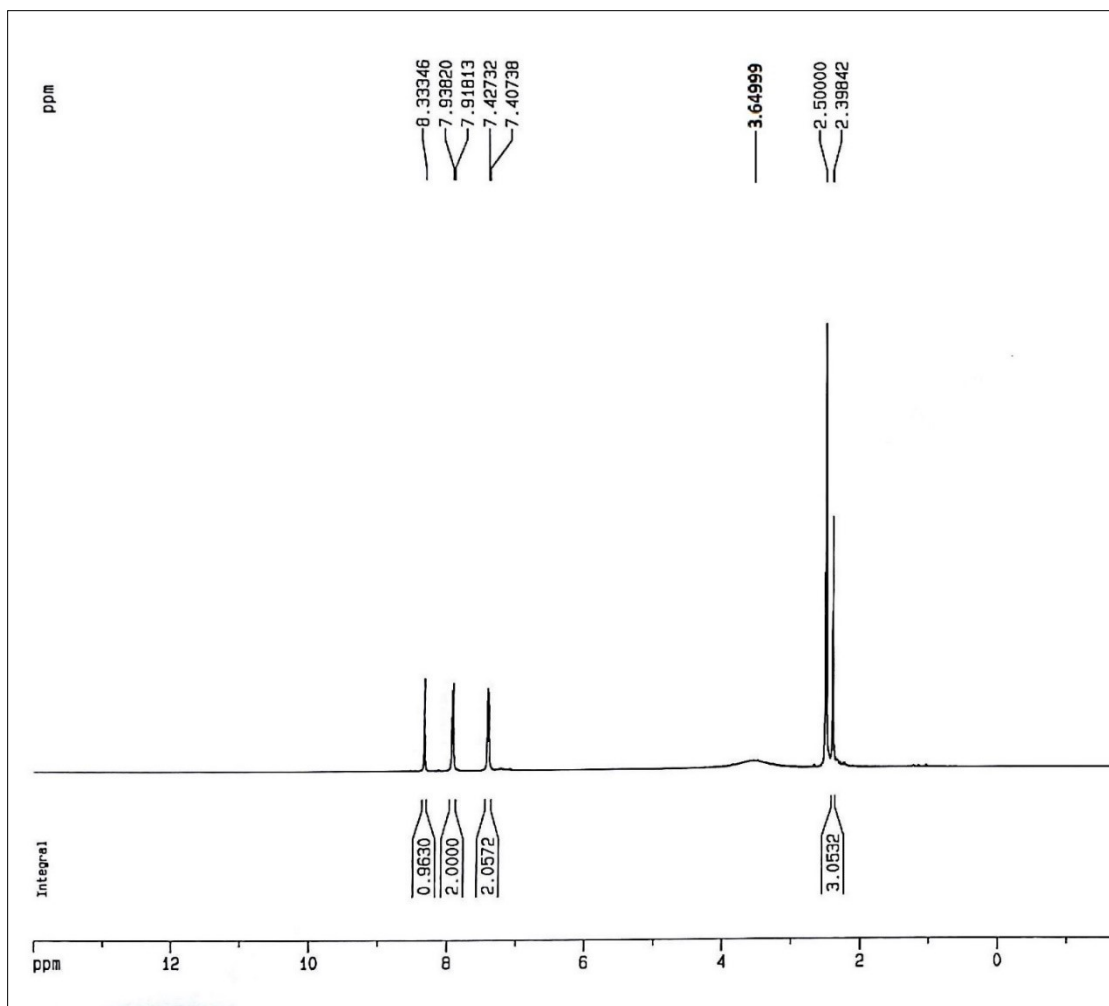

<sup>1</sup>HNMR, (E)-2-(1H-tetrazol-5-yl)-3-(p-tolyl)acrylonitrile.

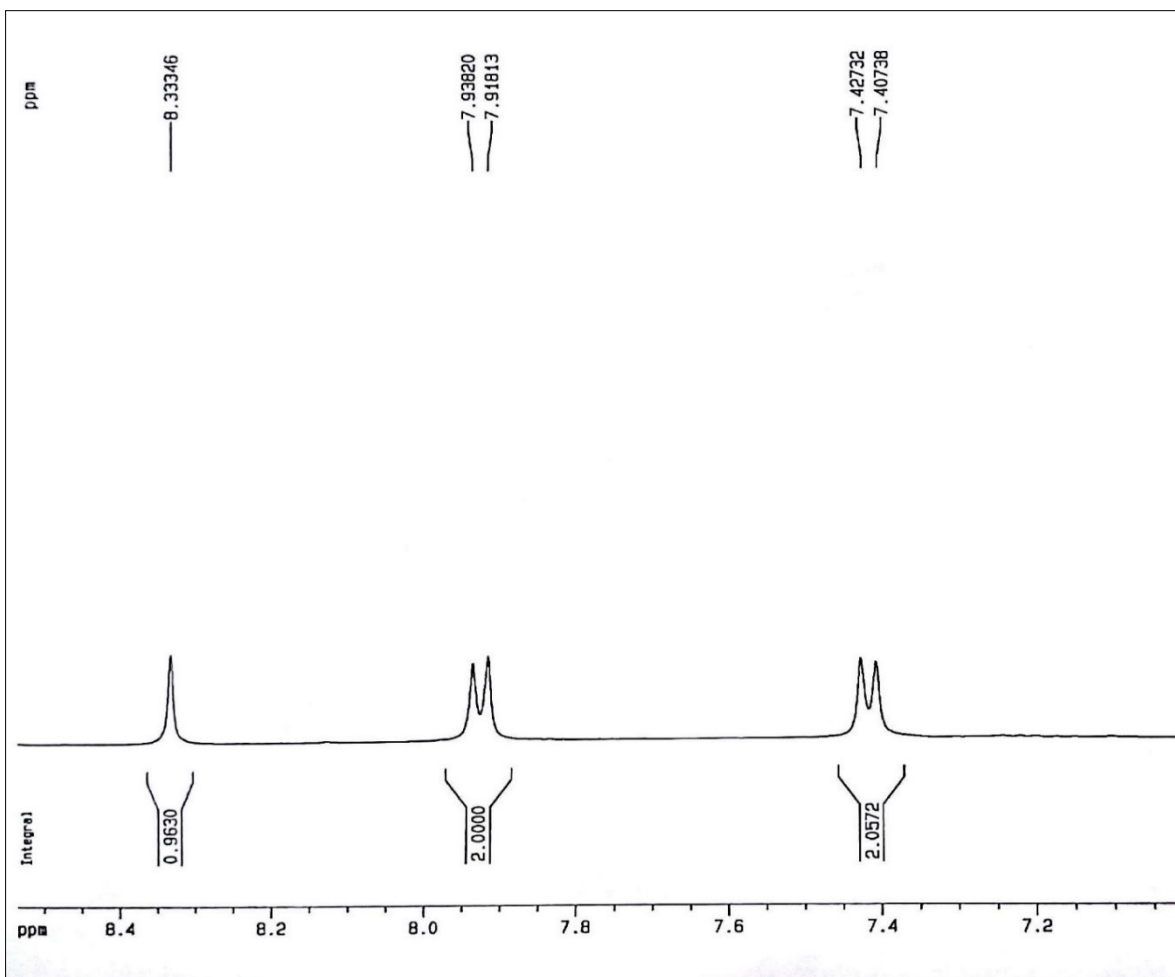

<sup>1</sup>HNMR, (E)-2-(1H-tetrazol-5-yl)-3-(p-tolyl)acrylonitrile.

**Table 3, Entry 8:**

**(E)-3-(2-chlorophenyl)-2-(1H-tetrazol-5-yl)acrylonitrile.** M.P: 176-178° C. <sup>1</sup>H-NMR (DMSO-d<sub>6</sub>), δppm: 2.5 (brs, NH, overlap with solvent), 7.56-7.63 (m, 2H, CH-Ar), 7.68-7.70 (d, 1H, CH-Ar), 8.13-8.14 (d, 1H, CH-Ar), 8.54(s, 1H, CH). <sup>13</sup>C -NMR (DMSO-d<sub>6</sub>), δppm: 101.44, 114.74, 127.13, 129.73, 130,19, 130.57, 133.34, 134.09, 144.11, 155.32.

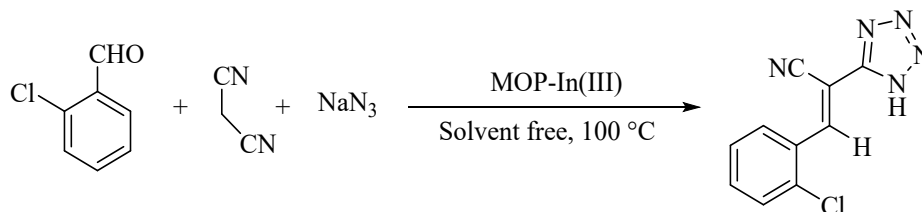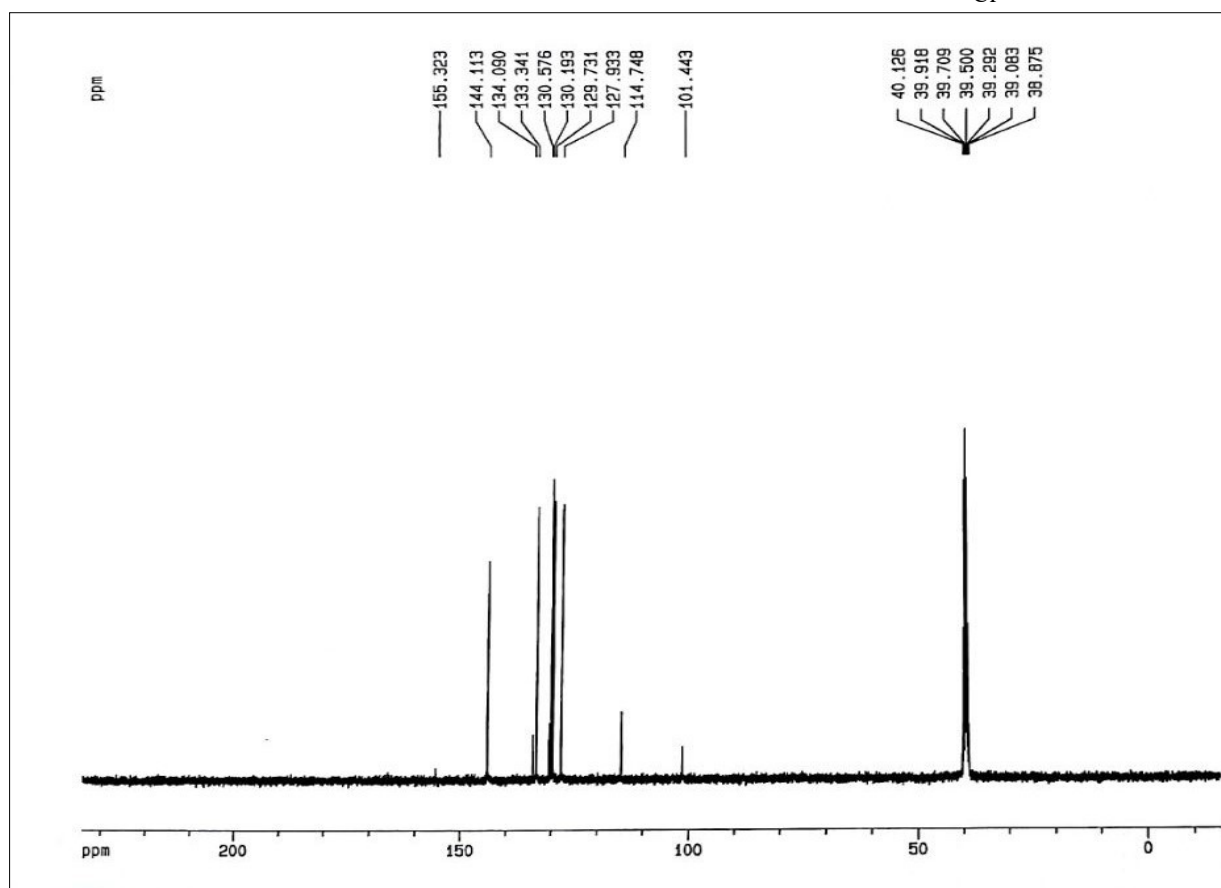

<sup>13</sup>C NMR, (E)-3-(2-chlorophenyl)-2-(1H-tetrazol-5-yl)acrylonitrile.



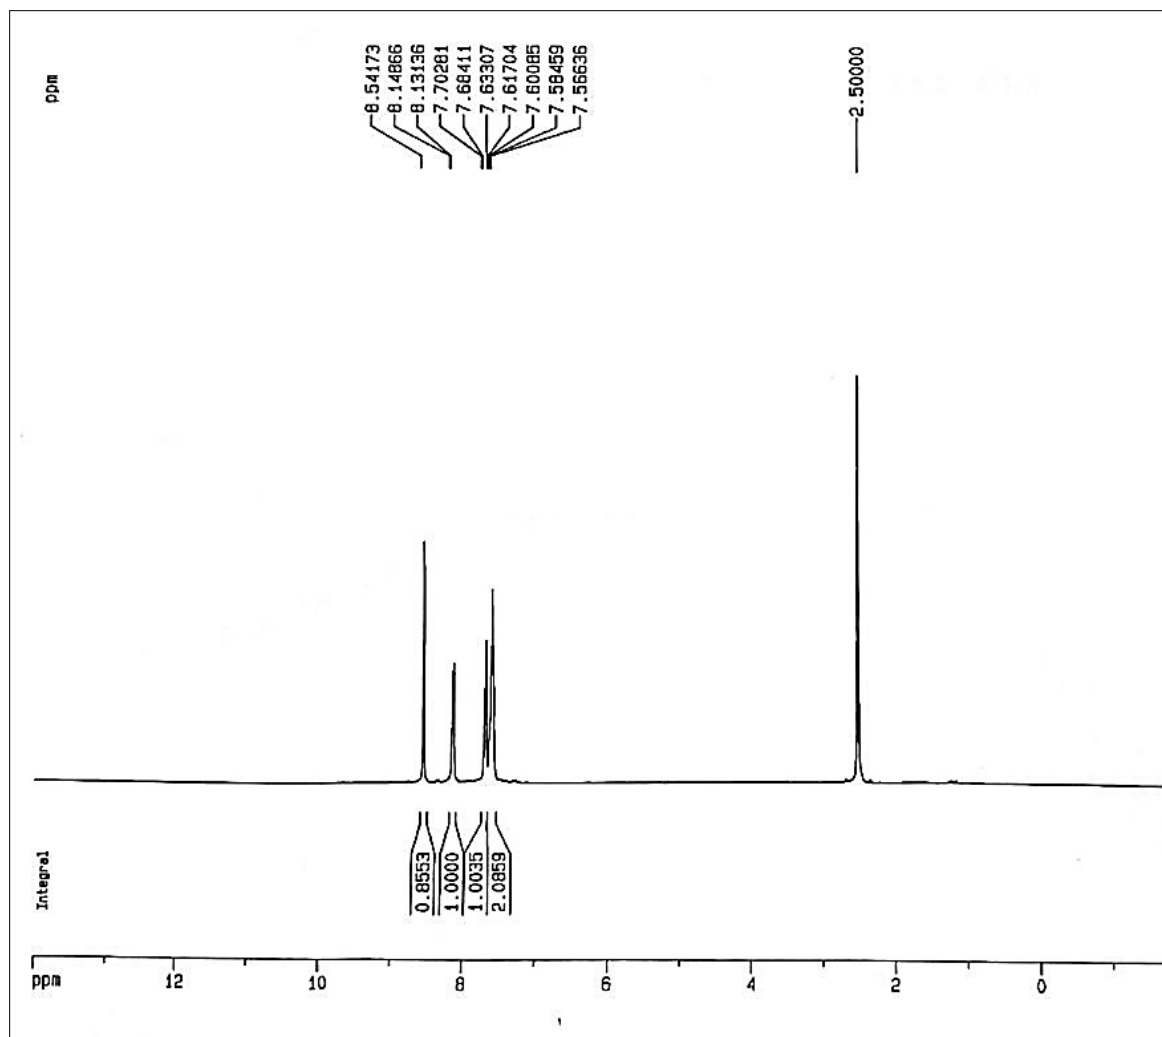

$^1\text{H-NMR}$ , (E)-3-(2-chlorophenyl)-2-(1H-tetrazol-5-yl)acrylonitrile.

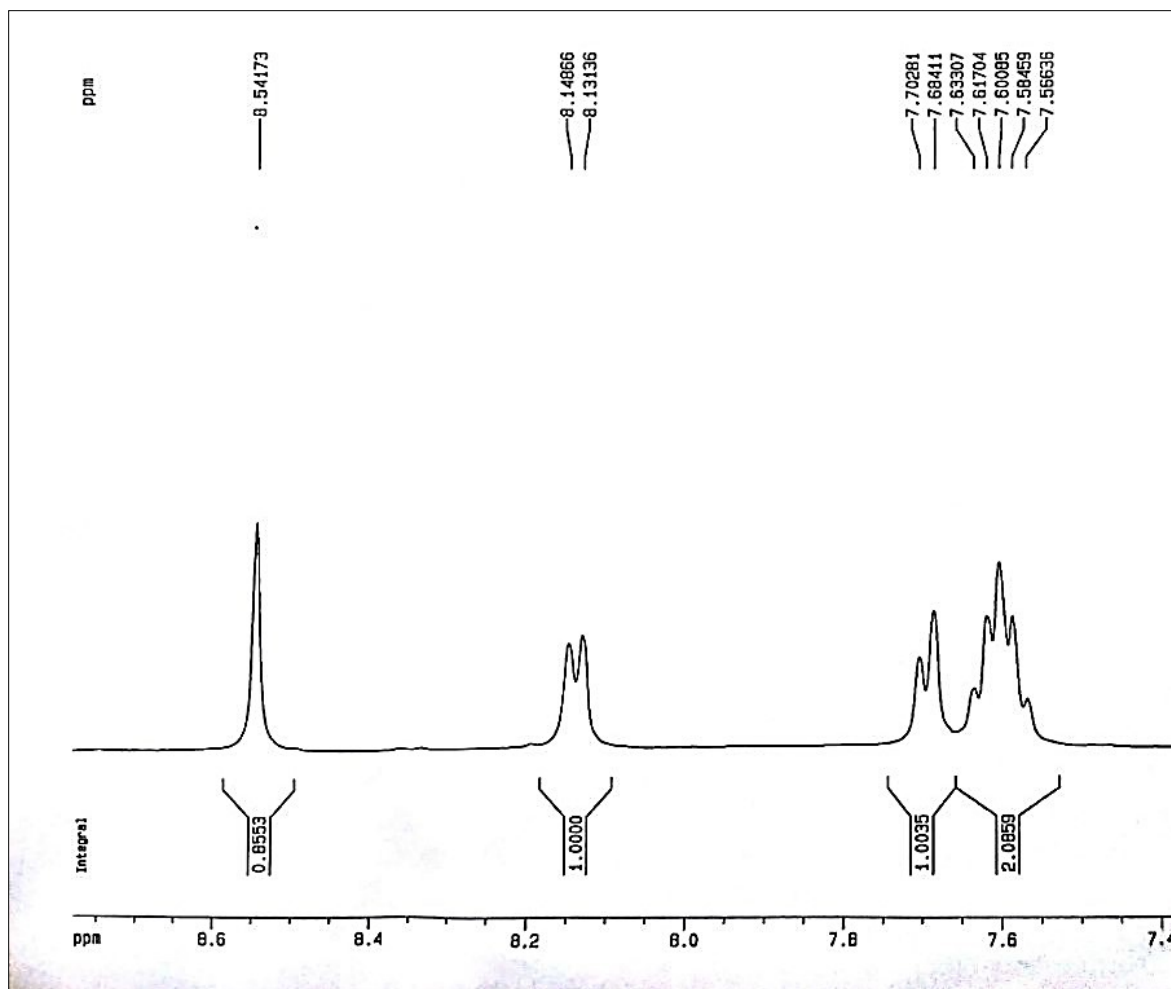

<sup>1</sup>HNMR, (E)-3-(2-chlorophenyl)-2-(1H-tetrazol-5-yl)acrylonitrile.

**Table 3, Entry 10:**

**3-(5-Bromo-2-hydroxyphenyl)-2-(1H-tetrazole-5-yl) acrylonitrile.** MS, m/z: 292.1 (M+H)<sup>+</sup>, 314.1 (M+Na)<sup>+</sup>. <sup>1</sup>H NMR (400 MHz, DMSO-d<sub>6</sub>): δH (ppm) 3.54 (br s, NH, overlap with solvent), 7.54–7.63 (1H, CH-Ar), 7.64–7.71(1H, CH-Ar), 8.12–8.14 (1H, CH-Ar), 8.44(s, 1H, CH). <sup>13</sup>C NMR (100 MHz, DMSO-d<sub>6</sub>): δC (ppm) 115.9, 119.9, 121.4, 126.1, 128.6, 136.3, 143.9, 146.9, 148.3, 149.6

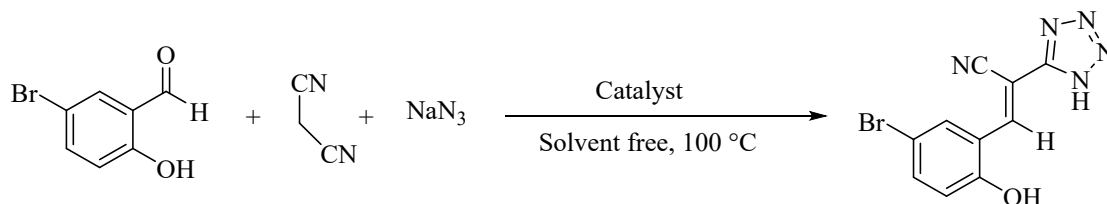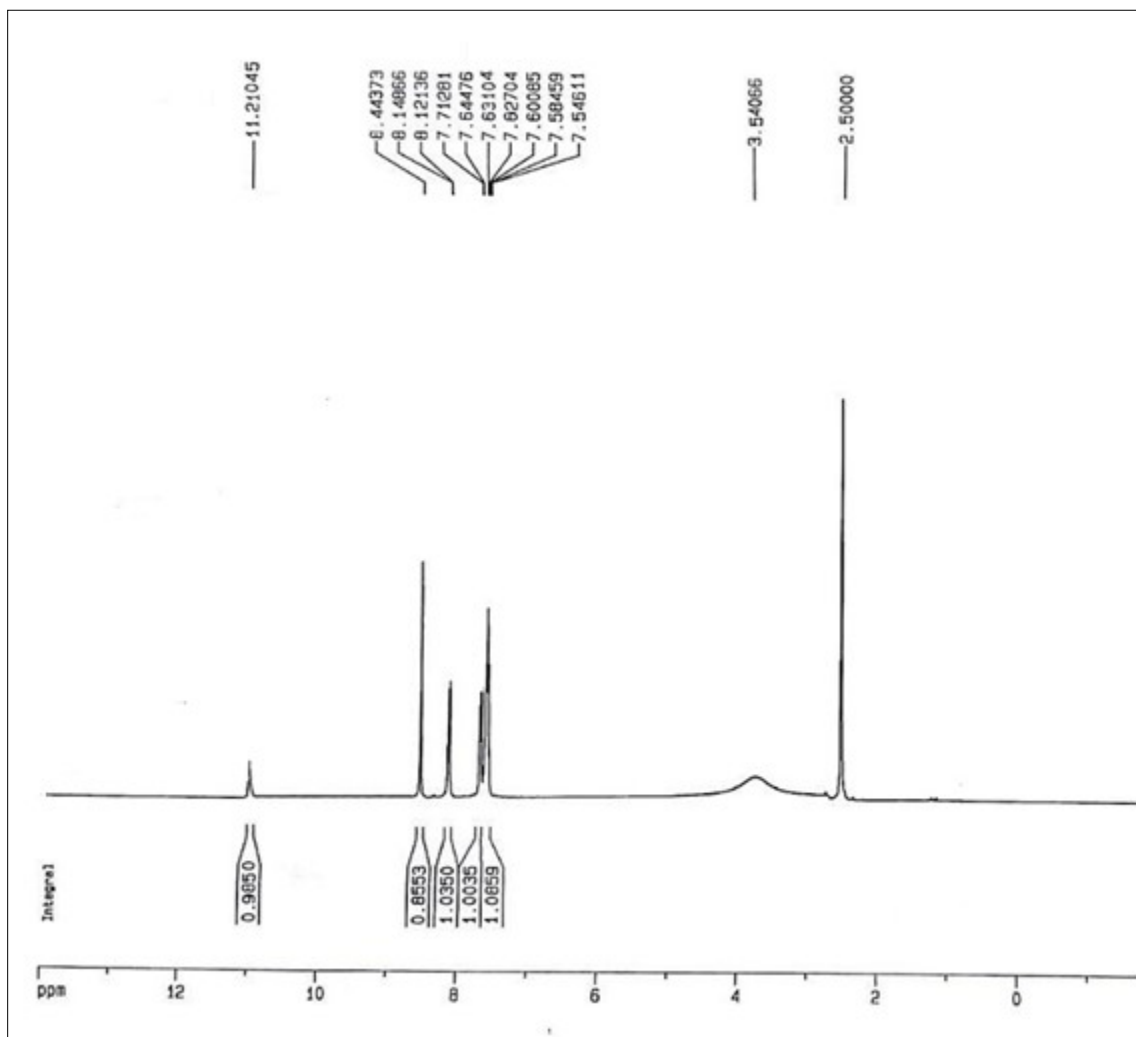

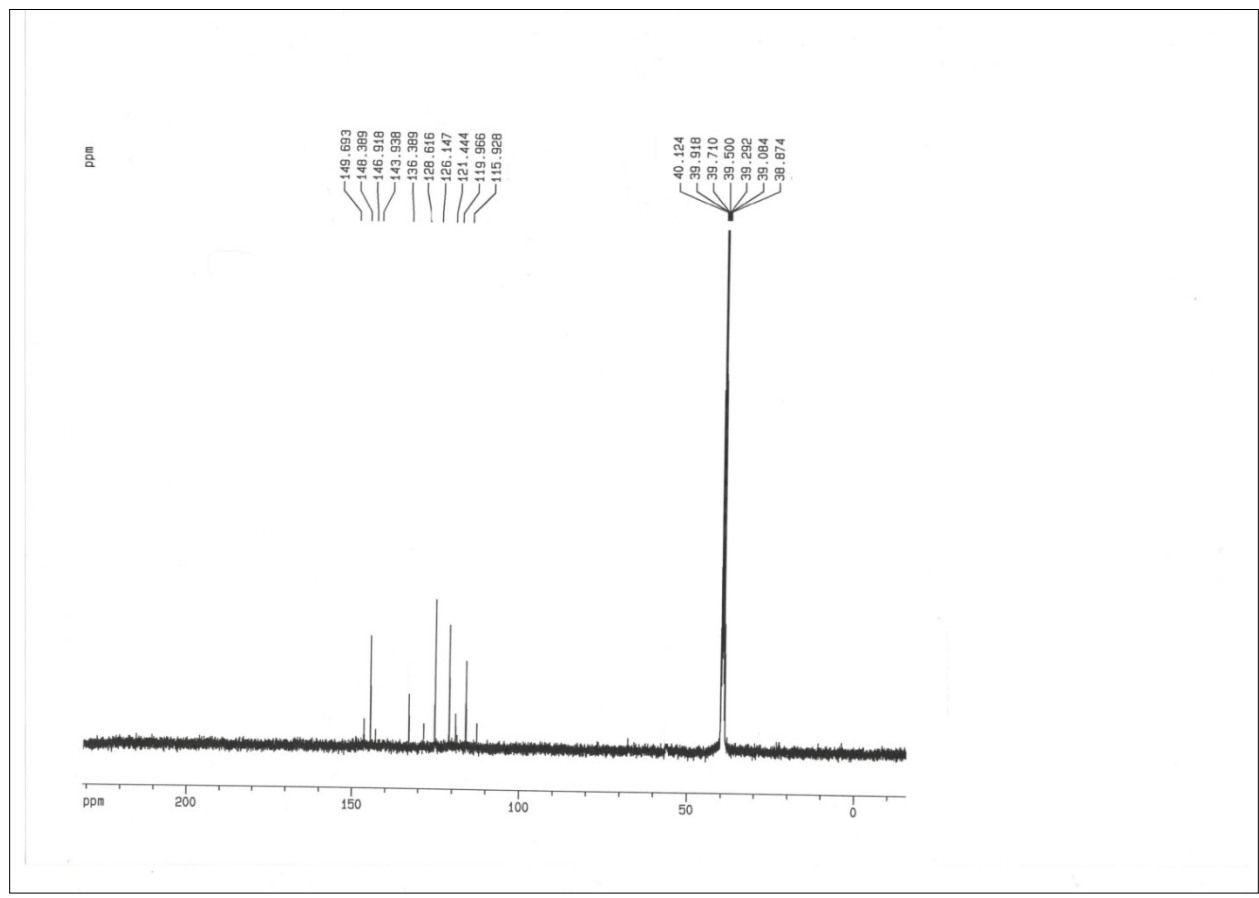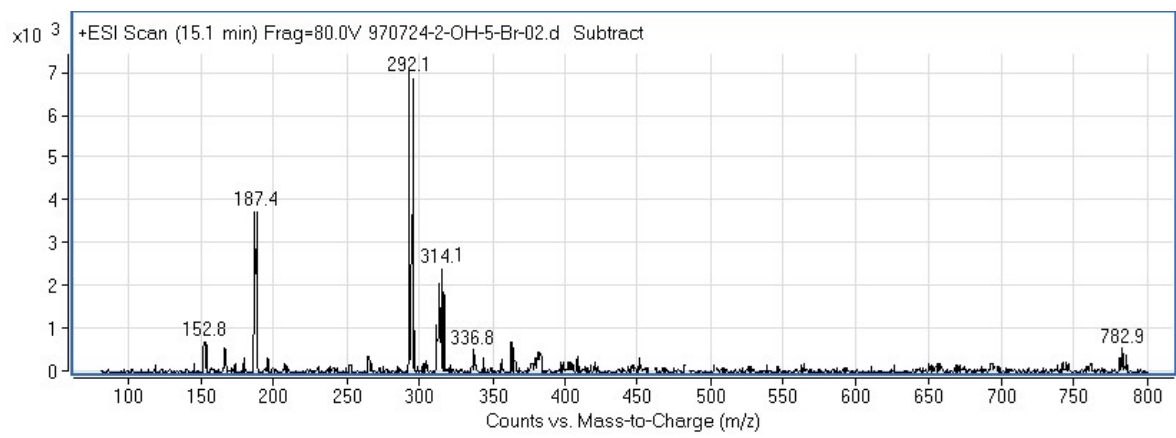

**Table 3, Entry 11:**

**3-(4-Fluorophenyl)-2-(1H-tetrazole-5-yl) acrylonitrile.** IR (KBr) ( $\nu_{\text{max}}/\text{cm}^{-1}$ ): 3109 (NH), 2228 (CN), 1595 (C=C). MS,  $m/z$ : 216 (M+H)<sup>+</sup>, 238 (M+Na)<sup>+</sup>. <sup>1</sup>H NMR (400 MHz, DMSO-d<sub>6</sub>):  $\delta$ H (ppm) 3.50 (br s, NH, overlap with solvent), 7.45–7.49 (2H, CH-Ar), 8.098–8.120 (2H, CH-Ar), 8.40 (1H, CH). <sup>13</sup>C NMR (100 MHz, DMSO-d<sub>6</sub>):  $\delta$ C (ppm) 96.7, 119.8, 119.9, 123.8, 131.8, 132.5, 132.6, 147.0

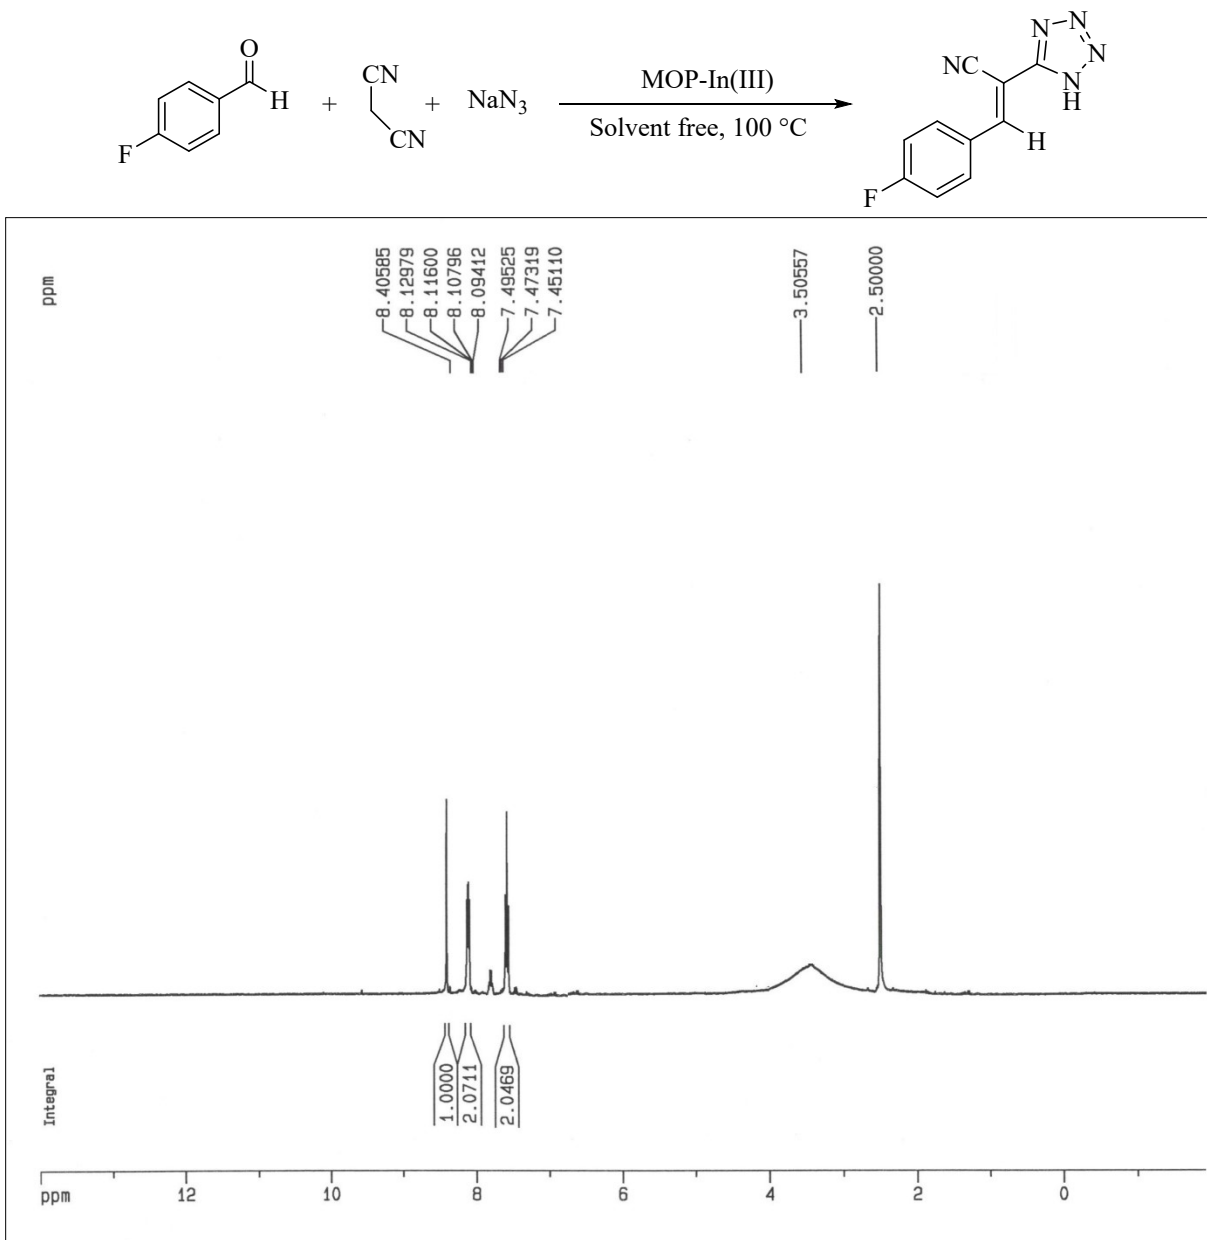

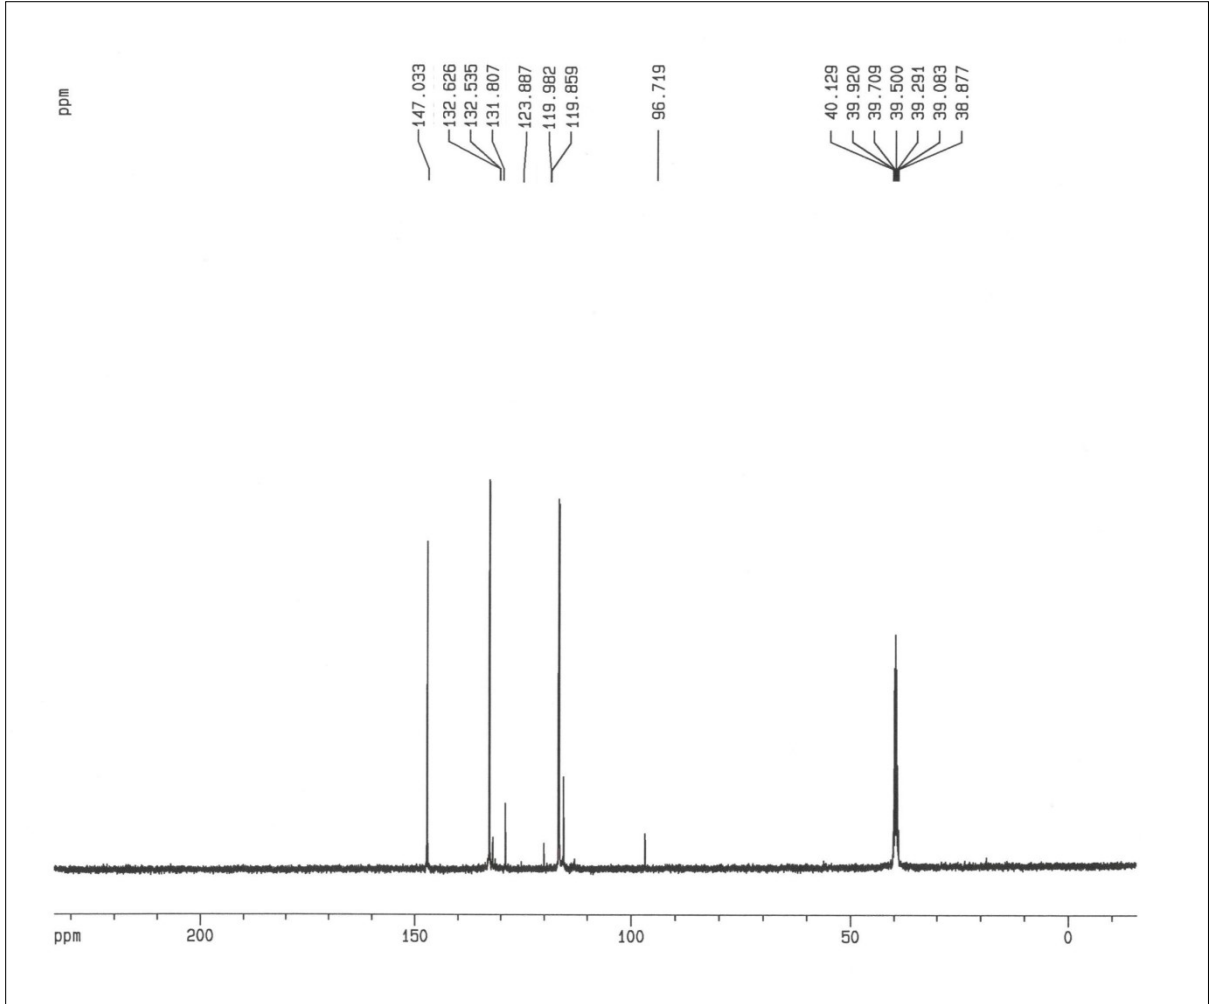

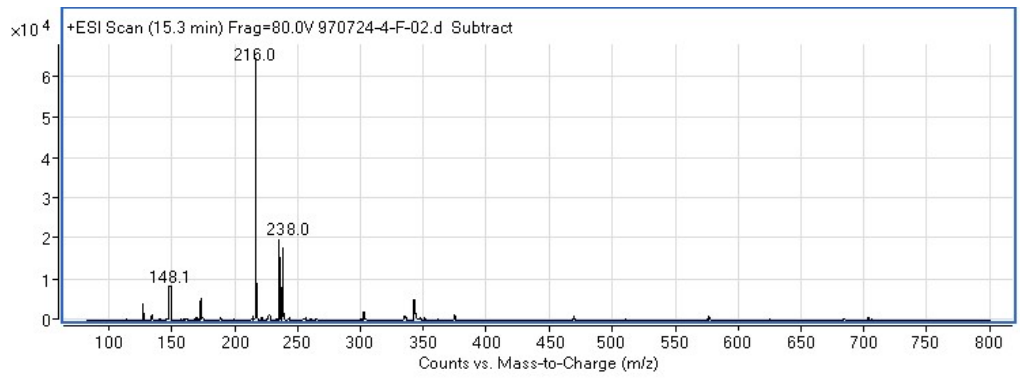

**Table 3, Entry 12:**

**3-(2-Hydroxy-3-methoxyphenyl)-2-(1H-tetrazole-5-yl) acrylonitrile.** IR (KBr) ( $\nu_{\max}/\text{cm}^{-1}$ ): 3174 (NH), 2201 (CN), 1580 (C=C). MS,  $m/z$ : 243 (M+H)<sup>+</sup>, 266 (M+Na)<sup>+</sup>. <sup>1</sup>H NMR (400 MHz, DMSO-d<sub>6</sub>):  $\delta$ H (ppm) 3.50 (br s, NH, overlap with solvent), 3.81 (3H, OCH<sub>3</sub>), 7.36–7.44 (2H, CH-Ar), 7.53–7.55 (2H, CH-Ar), 9.00 (1H, CH), 11.00 (1H, OH). <sup>13</sup>C NMR (100 MHz, DMSO-d<sub>6</sub>):  $\delta$ C (ppm) 56.2, 112.6, 115.9, 118.9, 120.9, 125.1, 128.6, 142.9, 144.4, 146.3, 149.6.

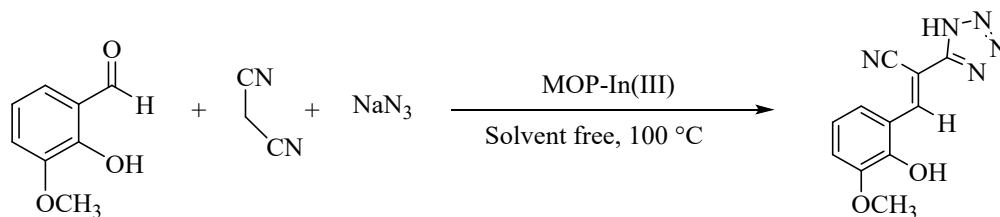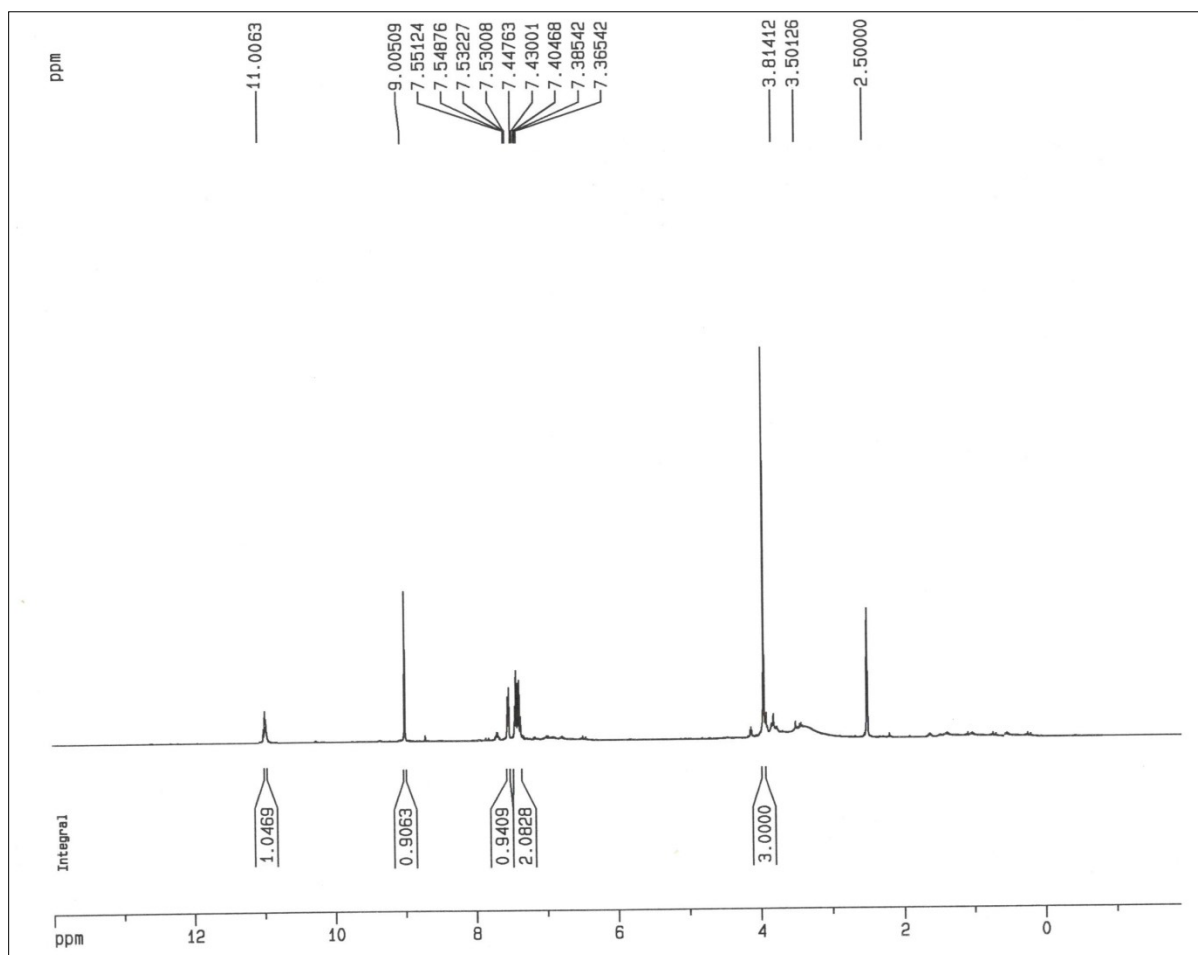



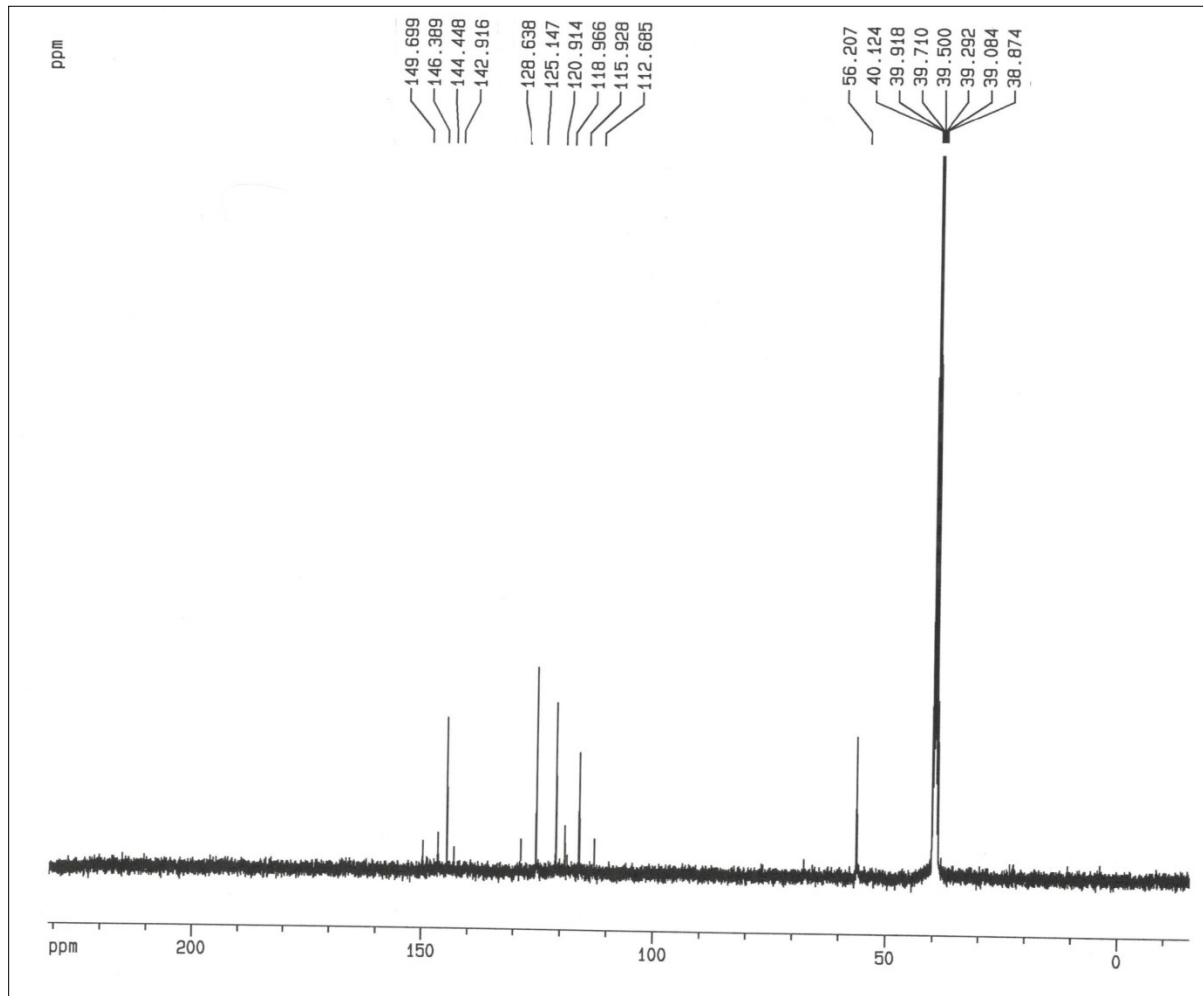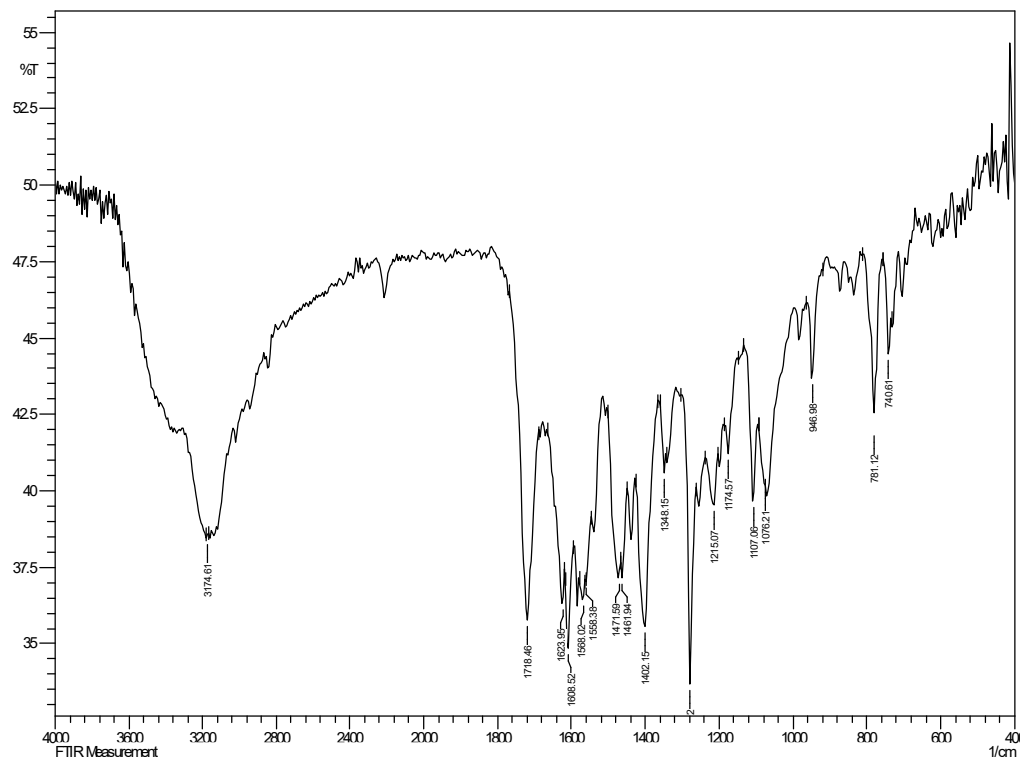

Supplement: d3nj04941h1.pdf [file d3nj04941h1.pdf]
